# Supplementary material for: Large Scale Genotype Comparison of Human Papillomavirus E2-Host Interaction Networks Provides New Insights for E2 Molecular Functions
Source: PLoS Pathog. 2012 Jun 28;8(6):e1002761. doi: 10.1371/journal.ppat.1002761 (PMC3386243; doi:10.1371/journal.ppat.1002761)
Supplement: Table S1 — Literature curated interactions (LCI). List of interactions found for the HPV E2 proteins in the VirHostNet and virusMINT and PubMed databases. The circles (°) represent interactions only found by literature mining. The number 1 symbolizes a demonstrated interaction, while 0 stands for a non-detected interaction. The number of LCE2-PPI represented in our GS dataset is indicated. (XLS) [file ppat.1002761.s005.xls]

## Sheet: Feuil1
	HPV16	HPV18	HPV31	HPV11	HPV6	HPV5	HPV8	HPV1	Total PPI	PPI selected as GS	PMID
AP3D1	1								1	1	PMID : 12457967
BRCA1		1							1	0	PMID : 12767931
BRD4	1	1	1	1	1		1	1	7	6	PMID : 15109495 //// PMID : 16921027 //// PMID : 16973557
BTBD1	1°								1	1	PMID : 18305892
BTBD2	1°								1	0	PMID : 18305892
C1QBP						1°			1	1	PMID : 10713112
CASP8	1°	1°							2	2	PMID : 18421300
CCHCR1	1°								1	0	PMID : 18305892
CDC20	1°	1°		0°	0°				2	2	PMID : 16222116
CDH1	1°	1°		0°	0°				2	2	PMID : 16222116
CEBPA	1	1					1		3	0	PMID : 12692227
CEBPB	1	1					1		3	0	PMID : 12692227
CFLAR	1								1	0	PMID : 20882347
CUL3	1								1	0	PMID : 19553317
DDX11	1°			1°					2	2	PMID : 17189189
EIF6	1								1	1	PMID : 12457967
EP300		1				1	1		3	0	PMID : 12368347 ////PMID : 10702269
EP400	1								1	0	PMID : 20133580
GNB2L1	1								1	0	PMID : 12457967
GPS2	1								1	1	PMID : 9372953
GTF2B	1								1	1	PMID : 9311902
HOXC9	1°								1	1	PMID : 18305892
hSNF5		1							1	0	PMID : 20829602
KIF20A	1°			1°					2	2	PMID : 17135315
MDM2	1								1	0	PMID : 19004934
NAP1L1		1				1	1		3	3	PMID : 14966293
NR4A1	1°								1	1	PMID : 16847753
OAZ1	1								1	0	PMID : 12457967
PARP		1°							1	0	PMID : 12185587
PCAF	1	1		1	1				4	0	PMID : 11744716
PLK1	0°					1°			1	0	PMID : 19152411
POMP	1								1	1	PMID : 12457967
PPME1	1								1	1	PMID : 12457967
SKP2		1							1	1	PMID : 19828607
SF1	1°								1	0	PMID : 18305892
SFRS1						1°			1	1	PMID : 10713112
SFRS2						1°			1	1	PMID : 10713112
SFRS7						1°			1	1	PMID : 10713112
SFRS10						1°			1	0	PMID : 10713112
SMCX	1								1	0	PMID : 20133580
SMN1	1	1		1					3	0	PMID : 10369867
SNRNP70						1°			1	0	PMID : 10207001
SP1		1					1		2	0	PMID : 11842244
TAF1	1	1							2	0	PMID : 18580066
TAF6		1							1	0	PMID : 15564746
TAF7						1			1	0	PMID : 9820841
TAX1BP1	1°	1°							2	2	PMID : 19109394
TBP	1						1		2	2	PMID : 9820841
TMF1	1°								1	0	PMID : 18305892
TNPO3						1°			1	0	PMID : 10713112
TOP1	1								1	0	PMID : 16537084
TOPBP1	1								1	0	PMID : 11934899
TP53	1	1		0	0				2	2	PMID : 10618715 //// PMID : 16611918
Total PPI	36	19	1	5	2	11	7	1	82	39
Distinct cellular proteins									53	24
