# Supplementary material for: Large Scale Genotype Comparison of Human Papillomavirus E2-Host Interaction Networks Provides New Insights for E2 Molecular Functions
Source: PLoS Pathog. 2012 Jun 28;8(6):e1002761. doi: 10.1371/journal.ppat.1002761 (PMC3386243; doi:10.1371/journal.ppat.1002761)
Supplement: Table S4 — HT-GPCA interaction dataset between E2 proteins and the gold standards. Matrix of Normalized Luminescence Ratio (NLR) between the 24 gold standards (positive controls) and the 12 E2 proteins. In bold are represented the gold standards identified in the Y2H screen. The asterisks (*) represent interactions described in the literature (LCE2-PPI). (XLS) [file ppat.1002761.s008.xls]

## Sheet: Feuil1
Symbol	HPV16	HPV18	HPV33	HPV39	HPV32	HPV6	HPV11	HPV3	HPV1	HPV9	HPV5	HPV8
AP3D1	0.71*	1.00	1.78	0.70	0.81	0.82	0.86	0.87	0.79	1.18	1.53	2.21
BRD4	6.89*	26.40*	71.59	22.97	21.65	27.15*	35.94*	14.25	67.20*	153.11	200.56*	200.90
BTBD1	4.49*	2.46	2.39	1.50	0.61	0.48	0.82	2.15	1.95	1.92	2.69	3.00
C1QBP	0.97	2.09	1.04	1.13	0.72	1.08	1.04	3.25	2.30	2.88	4.26*	2.83
CASP8	11.38*	21.64*	23.76	16.02	3.37	11.69	6.99	53.49	50.62	14.60	27.29	11.46
CDC20	5.41*	3.44*	3.83	1.58	0.96	1.41	1.24	2.04	5.52	9.85	5.38	8.80
CDH1	1.44*	2.50*	3.26	1.55	1.04	1.21	1.24	4.21	15.42	8.33	7.67	5.70
DDX11	0.99*	0.71	0.76	0.54	0.28	0.49	0.49*	1.35	1.90	0.56	0.96	0.83
EIF6	3.88*	1.35	3.56	1.70	0.52	0.46	0.73	1.54	1.23	1.70	10.53	1.15
GPS2	10.08*	8.16	9.44	4.24	1.99	2.12	3.22	4.03	19.55	38.77	37.52	14.67
GTF2B	4.17*	1.04	1.86	1.34	0.74	0.75	0.83	0.66	1.00	1.09	1.58	0.95
HOXC9	5.88*	2.62	7.50	3.90	2.01	2.84	2.82	4.26	10.04	41.60	10.88	7.01
KIF20A	6.80*	6.60	6.15	3.46	2.53	5.17	2.90*	7.12	21.92	167.93	15.87	11.76
NAP1L1	2.86	2.86*	1.55	1.94	0.45	0.77	1.06	22.46	10.39	10.02	4.04*	8.41*
NR4A1	9.37*	10.29	16.76	7.80	4.37	6.92	6.87	6.00	25.71	62.60	44.77	32.00
POMP	2.36*	4.77	7.09	3.17	1.55	1.46	5.34	5.08	12.52	40.76	34.41	16.58
PPME1	11.27*	9.20	14.85	5.23	2.81	9.77	7.24	6.68	29.71	45.72	12.38	7.38
SFRS1	10.66	4.01	4.17	3.30	1.57	3.85	3.82	13.21	82.18	127.99	167.51*	183.54
SFRS2	1.64	1.76	3.06	1.81	0.80	1.04	1.79	1.99	20.50	45.77	13.78*	10.00
SFRS7	4.51	3.05	7.68	5.14	3.58	3.84	4.76	5.90	168.71	227.78	280.03*	782.45
SKP2	1.15	2.43*	2.23	1.15	0.75	0.70	0.69	1.08	2.31	3.70	2.76	4.27
TAX1BP1	21.17*	71.30*	46.04	18.67	20.80	22.17	23.23	226.78	138.42	19.19	18.36	48.03
TBP	8.14*	19.51	36.99	12.94	7.16	6.84	16.73	18.22	25.73	25.48	38.14	27.17*
TP53	5.68*	11.38*	12.83	6.61	6.58	4.71	7.89	23.81	14.23	31.42	26.43	17.11
