# Supplementary material for: Large Scale Genotype Comparison of Human Papillomavirus E2-Host Interaction Networks Provides New Insights for E2 Molecular Functions
Source: PLoS Pathog. 2012 Jun 28;8(6):e1002761. doi: 10.1371/journal.ppat.1002761 (PMC3386243; doi:10.1371/journal.ppat.1002761)
Supplement: Table S9 — Ubiquitination family. Interaction scoring obtained by HT-GPCA. (XLS) [file ppat.1002761.s013.xls]

## Sheet: Feuil1
Symbol	HPV1	HPV5	HPV8	HPV9	HPV3	HPV18	HPV33	HPV16	HPV39	HPV6	HPV11	HPV32
BTBD1	1.95	2.69	3.00	1.92	2.15	2.46	2.39	4.49	1.50	0.48	0.82	0.61
CASP8	50.62	27.29	11.46	14.60	53.49	21.64	23.76	11.38	16.02	11.69	6.99	3.37
CDC20	5.52	5.38	8.80	9.85	2.04	3.44	3.83	5.41	1.58	1.41	1.24	0.96
CDH1	15.42	7.67	5.70	8.33	4.21	2.50	3.26	1.44	1.55	1.21	1.24	1.04
DERL2	8.03	7.77	6.74	11.07	7.24	7.32	7.62	3.05	4.89	3.37	2.21	2.22
FBXO22	4.42	2.95	3.04	4.75	3.18	3.59	5.57	2.64	1.85	2.58	2.15	1.52
HUWE1	2.04	5.80	3.61	4.63	0.78	1.00	1.27	1.42	1.23	2.64	1.09	0.92
PIAS1	4.23	5.80	3.33	6.71	2.58	1.64	2.71	1.11	1.16	0.80	1.72	0.73
PIAS4	3.68	5.76	3.17	16.77	1.83	1.66	3.59	2.46	2.29	1.04	1.63	0.73
POMP	12.52	34.41	16.58	40.76	5.08	4.77	7.09	2.36	3.17	1.46	5.34	1.55
PSMA2	2.74	7.89	4.85	8.50	1.75	2.15	3.86	3.22	3.07	0.91	0.72	0.69
SKP2	2.31	2.76	4.27	3.70	1.08	2.43	2.23	1.15	1.15	0.70	0.69	0.75
SPOP	9.53	59.11	47.34	83.17	37.18	16.28	24.57	5.69	4.08	26.13	19.38	57.28
UBA1	8.47	3.94	14.23	4.43	4.73	3.12	2.32	3.51	1.41	1.71	2.58	2.24
UBE2K	1.19	1.47	1.30	2.96	0.56	1.15	1.46	2.66	13.78	0.45	0.69	0.52
WWP2	25.60	18.21	19.10	37.36	16.12	9.35	3.57	4.06	2.69	2.35	2.21	1.51
